# Supplementary material
Source: publisher figshare collection journal article supplement (https://tandf.figshare.com/ndownloader/files/18786029)
Supplement: Supplementary file 1 [file 18786029]

*Appendix S1 – Focus group guides developed for each group of participants*

| **Moderator / Observer ID** | | | |
| --- | --- | --- | --- |
| Moderator’s name | | | |
|  | | | |
| Observer’s name | | | |
|  | | | |
| Starting time |  | Ending time |  |

| **Focus group assistance list** | | | |
| --- | --- | --- | --- |
|  | Sex | Age | Name |
| 1 |  |  |  |
| 2 |  |  |  |
| 3 |  |  |  |
| 4 |  |  |  |
| 5 |  |  |  |
| 6 |  |  |  |
| 7 |  |  |  |
| 8 |  |  |  |
| 9 |  |  |  |
| 10 |  |  |  |
| 11 |  |  |  |
| 12 |  |  |  |

| **Probe questions** | |
| --- | --- |
| 1 | Did you feel nervous yesterday? What expectations did you have of the Escape Room before you came? | |
| 2 | What was your general experience of today’s exam? | |
| 3 | Do you think that the Escape Room draws on knowledge from different modules? | |
| 4 | Do you think that this evaluation method benefits your learning more than other previously used ones, for example what the OSCE was like in previous years? How? | |
| 5 | What did you like most about this method? And what did you like the least? | |
| 6 | Did the Escape Room touch on situations that you have experienced during your clinical placements or that you could come across in your professional life? | |
| 7 | How did you feel working in a team? | |
| 8 | Did working together make you feel stronger as a group? Do you think you could have solved the problem more quickly? | |
| 9 | What did you know about Escape Room before the exam today? | |
| 10 | In general, would you repeat this experience in the following placements? | |

| **Evaluation for elements in the focus group by the observer** | |
| --- | --- |
| Adequate meeting point in size and acoustic |  |
| Neutral meeting point according to objectives of the focus group |  |
| Participants seated correctly (U distribution) |  |
| Objectives and methodology explained prior to the meeting starts |  |
| The moderator respects participants’ time to develop their idea in each theme |  |
| The moderator listens to and uses emerging information from participants |  |
| The objectives are achieved for this meeting |  |
| The moderator allows all participants to participate |  |
| The meeting lasts between 30 to 60 minutes |  |
| The information is registered (recorder) |  |
| Adequate interruptions by the moderator |  |
| Participants’ adequate identification |  |

(**A:** Adequate; **I:** Inadequate)

| **Participants’ evaluation by the observer** | | | |
| --- | --- | --- | --- |
|  | Corporal language | Adequate / Inadequate | Interruption / Speaking time kept |
| 1 |  |  |  |
| 2 |  |  |  |
| 3 |  |  |  |
| 4 |  |  |  |
| 5 |  |  |  |
| 6 |  |  |  |
| 7 |  |  |  |
| 8 |  |  |  |
| 9 |  |  |  |
| 10 |  |  |  |
| 11 |  |  |  |
| 12 |  |  |  |

| **General observation by the moderator** |
| --- |
|  |
